# Supplementary material for: Controllably tuning the near-infrared plasmonic modes of gold nanoplates for enhanced optical coherence imaging and photothermal therapy
Source: Royal Society of Chemistry journal article supplement (doi:10.1039/c5ra15204f), 2015-01-01
Supplement: c5ra15204f1.pdf [file c5ra15204f1.pdf]

Supporting information for:

**Controllably Tuning the Near-infrared Plasmonic Modes of Gold  
Nanoplates for Enhanced Optical Coherence Imaging and  
Photothermal Therapy**

Xueqin Jiang<sup>a</sup>, Renming Liu<sup>b</sup>, Peijun Tang<sup>a</sup>, Wanbo Li<sup>a</sup>, Huixiang Zhong<sup>a</sup>,  
Zhangkai Zhou<sup>b</sup>, and Jianhua Zhou<sup>a\*</sup>

X. Q. Jiang, W. B. Li, H. X. Zhong, Prof. J. H. Zhou

<sup>a</sup> Biomedical Engineering Department, School of Engineering, Sun Yat-sen  
University, Guangzhou 510275, China

R. M. Liu, Dr. Z. K. Zhou

<sup>b</sup> State Key Laboratory of Optoelectronic Materials and Technologies, School of  
Physics and Engineering, Sun Yat-sen University, Guangzhou 510275, China

\*Corresponding author:

Tel.: +86 20 39387890; Fax: +86 20 39387890

E-mail: [zhoujh33@mail.sysu.edu.cn](mailto:zhoujh33@mail.sysu.edu.cn) (J.H. Zhou).

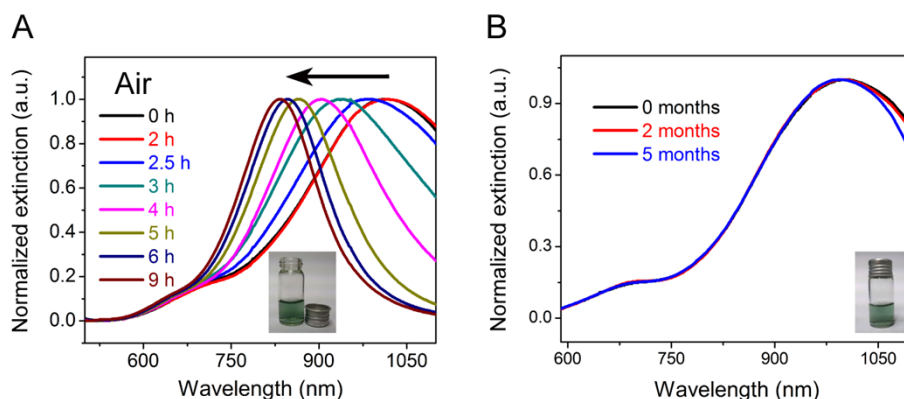

**Figure S1.** (A) Normalized UV-vis absorption spectra taken from solution exposed to air.

Inset: photograph of sample exposed to air. The longitudinal plasmon band shifts from 1021 nm to 832 nm in 9 h. (B) Time-dependent normalized UV-vis extinction spectra of GTNPs suspension which was sealed in a bottle for several months. Inset: photograph of suspension sealed in a bottle. The plasmon mode of GTNPs suspension almost didn't shift.

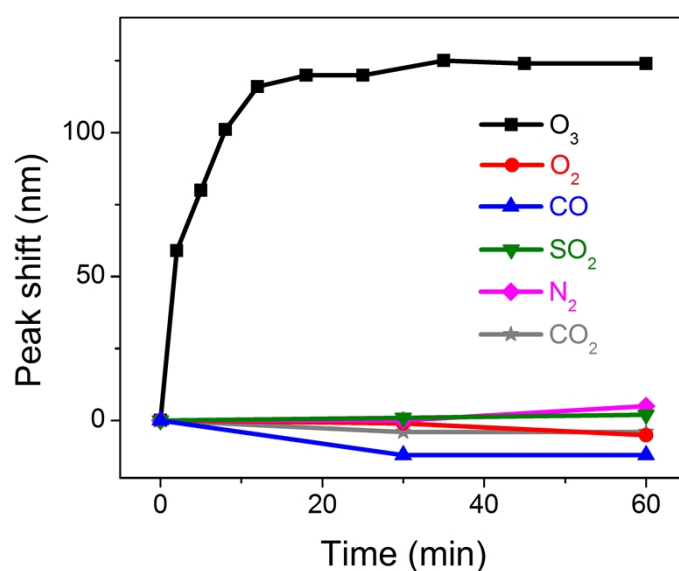

**Figure S2.** The influence of different types of gases in air on the plasmon mode shifts of GTNPs.

The plasmon mode shifts of GTNPs as a function of time after exposure to different

gases included  $O_3$ ,  $O_2$ ,  $CO$ ,  $SO_2$ ,  $N_2$ ,  $CO_2$ .

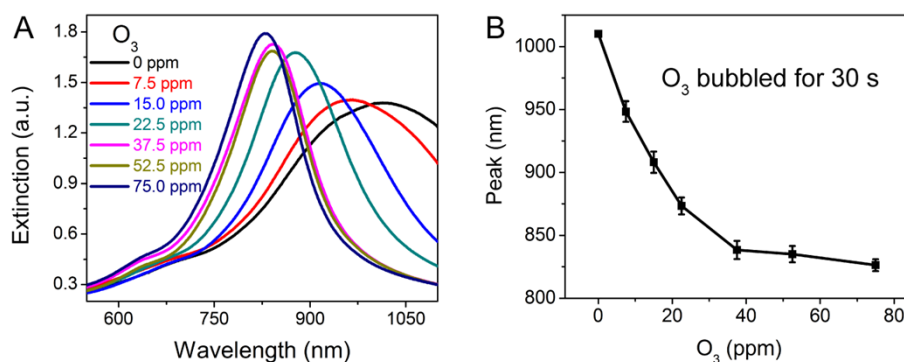

**Figure S3.** The effect of ozone with different concentrations on the plasmon mode shifts of GTNPs. (A) UV-vis extinction spectra of the GTNPs suspensions after exposing to different concentrations of  $O_3$  for 30 s. (B) The concentration-dependent plasmon mode shifts of the GTNPs suspensions corresponding to (A).

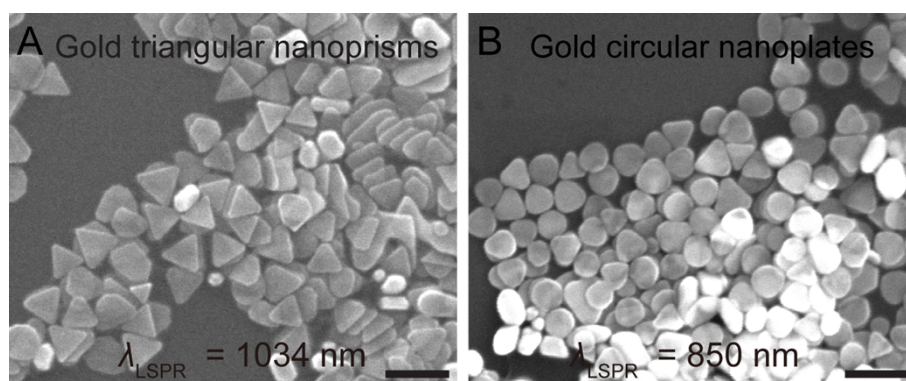

**Figure S4.** Morphologic changes of the GTNPs during the exposing process. Scanning electron microscope (SEM) images taken from the GTNPs (A) before and (B) after being exposed to  $O_3$  (75 ppm) for 60 min with their plasmon modes shifted from 1034 nm to 850 nm. The sharp corners of GTNPs were gradually rounded to form circular nanoplates but the plate-like morphology was preserved. The scale bars are 150 nm.

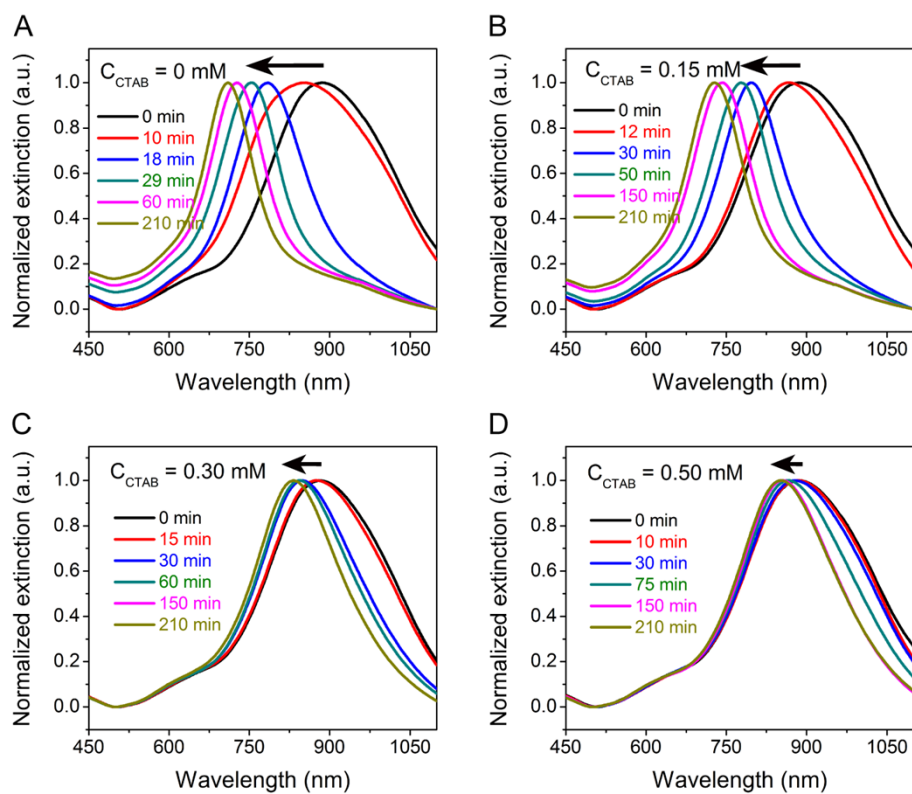

**Figure S5.** The rates of the plasmon mode shifts of GTNPs with different concentrations of CTAB in the suspension. Normalized UV-vis extinction spectra taken from GTNPs exposed to  $\text{O}_3$  ( $\sim 0.08 \text{ ppm}$ ) with the concentrations of CTAB in the suspension: (A) 0 mM; (B) 0.15 mM; (C) 0.30 mM; (D) 0.50 mM.

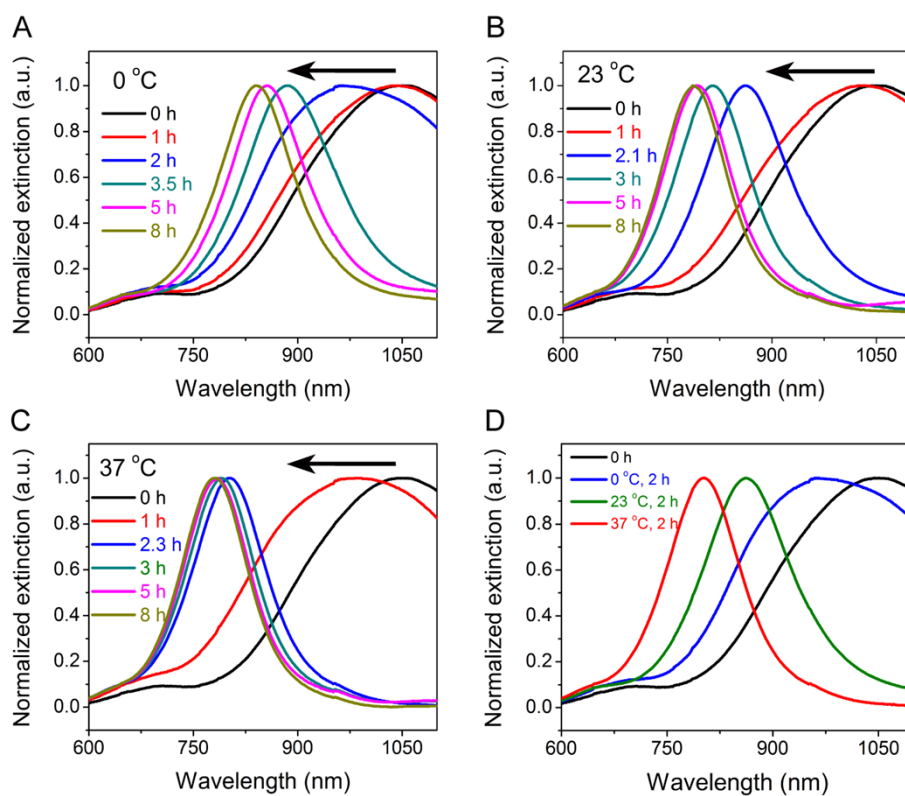

**Figure S6.** The rates of the plasmon mode shifts of GTNPs at different temperatures.

Normalized UV-vis extinction spectra taken from GTNPs suspensions exposed to  $O_3$  (~0.08 ppm) at (A) 0 °C; (B) 23 °C; (C) 37 °C; (D) Normalized UV-vis extinction spectra of the GTNPs suspensions after exposing to  $O_3$  at above-mentioned temperatures for 2 h.

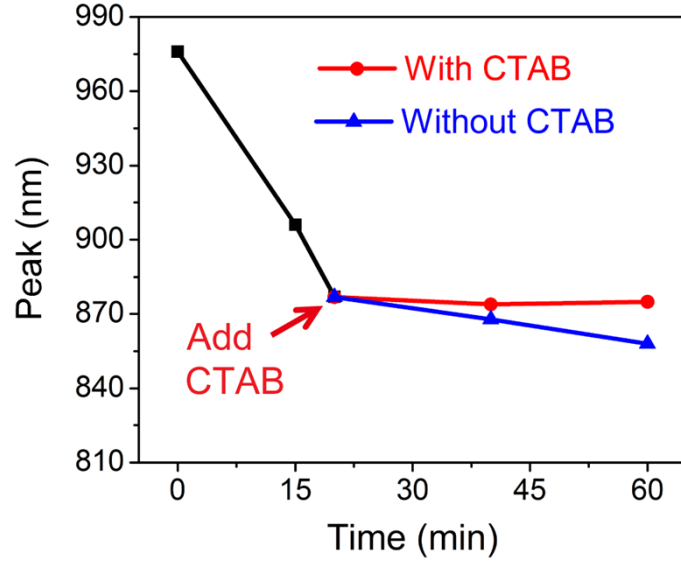

**Figure S7.** The stop of the plasmon mode shifting with and without adding CTAB. The GTNPs suspensions whose plasmon mode shifted to a specific wavelength in O<sub>3</sub> (in the atmosphere, ~0.12 ppm) were transferred to sealed bottles with (the red line) and without (the blue line) adding CTAB into the suspension.

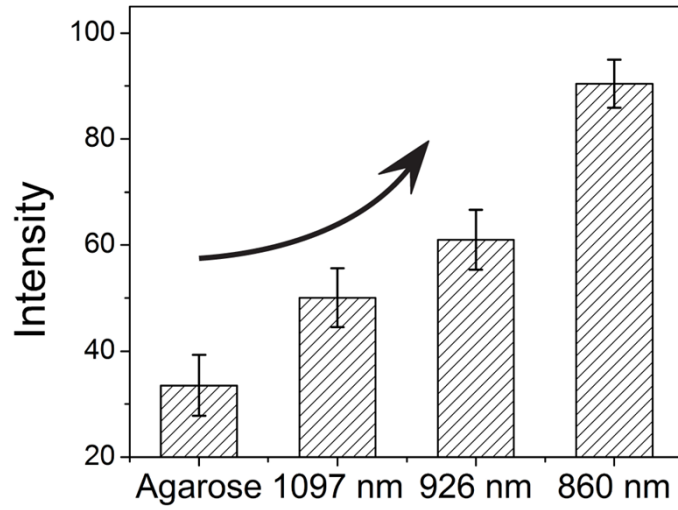

**Figure S8.** Enhancement of OCT signal using GTNPs with different plasmon modes. The signal intensities of agarose gel and GTNPs-agarose phantoms containing GTNPs before ( $\lambda_{\text{LSPR}} = 1097$  nm) and after ( $\lambda_{\text{LSPR}} = 926$  nm and 860 nm) tuning the process were measured by an 840-nm OCT system. We employed an area of 100  $\mu\text{m}$  (width) x 25  $\mu\text{m}$  (height) for intensity calculation; the

area was selected  $\sim 5 \mu\text{m}$  below the air-agarose interface.

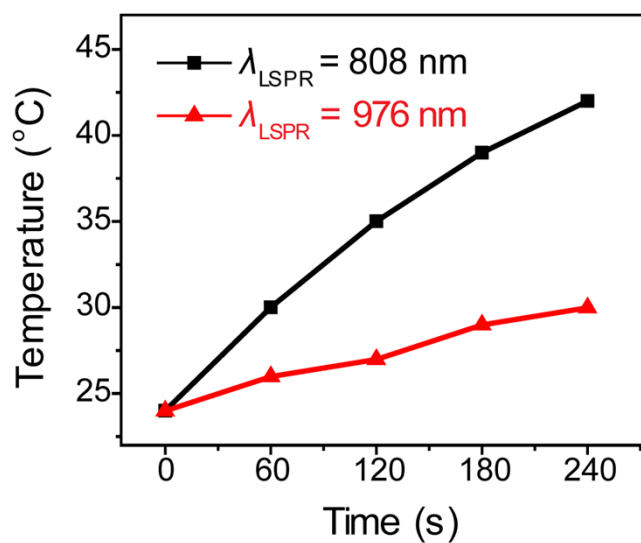

**Figure S9.** The temperature of the center of the channel loaded on with GTNPs obtained plasmon modes of 808 nm (the black line) and 976 nm (the red line) under radiation of a 808 nm laser.

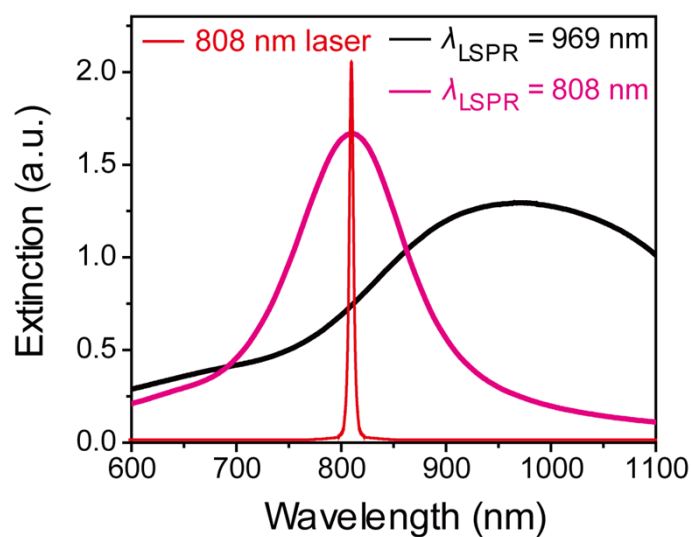

**Figure S10.** A schematics showing the wavelength of the NIR laser and UV-vis extinction spectra of GTNPs-agarose mixtures used in the demonstrations of thermotherapy.
